# Supplementary material
Source: PubMed Central journal article supplement (PMC5551504)
Supplement: NIHMS884235-supplement-Suppl_Tables_1-3.pdf [file NIHMS884235-supplement-Suppl_Tables_1-3.pdf]

Supplementary online only Table 1. Case-control studies that have evaluated anti-Ro/La titers in affected and non-affected pregnancies with CHB

| Author, year (reference)              | Study group: mothers of babies with ACHB (n) | Control groups (n)                                                                                      | Antibody (technique)                                             | Positive titers (n, %) or autoantibody levels (mean)                                                                                                               | P values (comparison between groups)                                                                                      |
|---------------------------------------|----------------------------------------------|---------------------------------------------------------------------------------------------------------|------------------------------------------------------------------|--------------------------------------------------------------------------------------------------------------------------------------------------------------------|---------------------------------------------------------------------------------------------------------------------------|
| Meilof et al, 1993 <sup>37</sup>      | 14                                           | - Mothers of babies with postnatal CHB (10)<br>- Ro+ SLE mothers of unaffected babies (12)              | Ro/SS-A (ELISA)                                                  | ND                                                                                                                                                                 | <b>Ro/SS-A &lt; 0,05</b> (fetal vs postnatal CHB)<br>Ro/SS-A > 0,05 (fetal CHB vs no CHB)                                 |
| Dörner et al, 1995 <sup>23</sup>      | 16                                           | - Ro+ SLE mothers of unaffected babies (8)                                                              | IgG Ro52, Ro60, La levels (recombinant Immunoblot)               | ND                                                                                                                                                                 | <b>Ro52 &lt; 0,015</b> , Ro60 > 0,05 and <b>La &lt; 0,015</b> (CHB vs no CHB)                                             |
| Silverman et al, 1995 <sup>46</sup>   | 21                                           | - Mothers of babies with neonatal rash (20)<br>- Ro+ SAD mothers of unaffected babies (16)              | Ro52, La levels (recombinant ELISA)                              | <i>Ro52 levels (mean): 0,71 vs 0,82 vs 0,29</i><br><i>La levels (mean): 0,51 vs 0,83 vs 0,01</i>                                                                   | Ro52: > 0,05 (CHB vs rash), <b>0,0006</b> (CHB vs no CHB)<br>La: <b>0,009</b> (CHB vs rash), <b>0,005</b> (CHB vs no CHB) |
| Salomonsson et al, 2002 <sup>43</sup> | 9                                            | - Ro+ SAD mothers of unaffected babies (26)                                                             | IgG Ro52, Ro60, La levels (recombinant ELISA/Western)            | ND                                                                                                                                                                 | <b>Ro52 &lt; 0,02</b> , <b>Ro60 &lt; 0,02</b> and <b>La &lt; 0,05</b> (CHB vs no CHB)                                     |
| Julkunen et al, 2004 <sup>35</sup>    | 67                                           | - SAD mothers of unaffected babies (136)*                                                               | Ro52, Ro60, La levels (recombinant TR-FIA and ELISA)             | ND                                                                                                                                                                 | > 0,05 (CHB vs SS without CHB)**<br><b>&lt; 0,001</b> (CHB vs non-SS without CHB)**                                       |
| Jaeggi et al, 2010 <sup>33</sup>      | 40                                           | - Ro+ SAD mothers of unaffected babies (146)                                                            | Ro52 ≥ 50 U/mL (recombinant ELISA)                               | 40 (100%) vs 64 (44%)                                                                                                                                              | <b>Ro52 &lt; 0,0001</b> (CHB vs no CHB)                                                                                   |
| Anami et al, 2012 <sup>14</sup>       | 17                                           | - Ro+ SAD mothers of unaffected babies (172)                                                            | Ro/SS-A ≥ 1:32 (DID, ND)                                         | 15 (88%) vs 93 (54%)                                                                                                                                               | <b>Ro/SS-A = 0,01</b> (CHB vs no CHB)                                                                                     |
| Reed et al, 2012 <sup>52</sup>        | 50                                           | - SAD mothers with CHB and subsequent unaffected babies (32)<br>- SAD mothers of unaffected babies (33) | Ro52 (full-length ELISA)<br>Ro60 (native)<br>La (purified ELISA) | <i>Ro52 levels (mean): 87 vs 93 vs 75</i><br><i>Ro60 levels (mean): 14,336 vs 16,896 vs 2,624</i><br><i>La levels (mean): 3,904 vs 1,944 vs 752</i>                | Ro52 > 0,05 (all comparisons)<br><b>Ro60 &lt; 0,05</b> (CHB/previous CHB vs no CHB)<br>La > 0,05 (all comparisons)        |
| Tunks et al, 2013 <sup>48</sup>       | 6                                            | - Ro+ SAD mothers of unaffected babies (27)                                                             | Ro/SS-A, La levels (Athena Multi-Lyte ANA-II Plus Test, ND)      | <i>Ro levels (mean):</i><br>No CHB: 496; type I: 443; type II: 520; type III: 520<br><i>La levels (mean):</i><br>No CHB 109, type I 335, type II 128, type III 267 | Ro/SS-A = 0,94 (CHB vs no CHB)<br><br><b>La = 0,04</b> (CHB vs no CHB)                                                    |

ND: Not detailed; TR-FIA: Time-resolved fluoroimmunoassay; DID: Double immune-diffusion; SAD: Systemic autoimmune disease. \*Ro+ in only 58% of cases, \*\*titers of the three antibodies

**Supplementary online only Table 2. Age of pacemaker implantation detailed in 192 reported cases**<sup>17,21,22,24,25,29,40,68,73,74,78,85,88,102,104,107,108</sup>

| Author (reference)                     | Total number of paced cases (n) | < 10 days (n)   | 10 days – 1 month (n) | 1-12 months (n) | 1-5 years (n)   | > 5 years (n) |
|----------------------------------------|---------------------------------|-----------------|-----------------------|-----------------|-----------------|---------------|
| Groves et al, 1996 <sup>29</sup>       | 11                              | 2               | 2                     | 4               | 1               | 2             |
| McLeod et al, 1998 <sup>107</sup>      | 1                               | -               | -                     | 1               | -               | -             |
| Eronen et al, 2000 <sup>103</sup>      | 6                               | 6               | -                     | -               | -               | -             |
| Askanase et al, 2002 <sup>108</sup>    | 5                               | -               | -                     | -               | 3               | 2             |
| Costedoat et al, 2003 <sup>21</sup>    | 1                               | -               | -                     | -               | 1               | -             |
| Costedoat et al, 2004 <sup>22</sup>    | 1                               | 1               | -                     | -               | -               | -             |
| Eronen et al, 2004 <sup>68</sup>       | 2                               | 1               | 1                     | -               | -               | -             |
| Stevens et al, 2005 <sup>109</sup>     | 1                               | -               | -                     | 1               | -               | -             |
| Gardiner et al, 2007 <sup>25</sup>     | 3                               | 1               | -                     | -               | 2               | -             |
| Friedman et al, 2008 <sup>78</sup>     | 1                               | 1               | -                     | -               | -               | -             |
| Brucato et al, 2009 <sup>17</sup>      | 26                              | 10              | 6                     | 7               | 3               | -             |
| Chockalingam et al, 2011 <sup>73</sup> | 1                               | -               | -                     | -               | -               | 1             |
| Fesslova et al, 2009 <sup>24</sup>     | 22                              | 6               | 6                     | 7               | 3               | -             |
| Hayashi et al, 2009 <sup>102</sup>     | 4                               | 1               | 1                     | 2               | -               | -             |
| Friedman et al, 2010 <sup>88</sup>     | 2                               | 2               | -                     | -               | -               | -             |
| Pisoni et al, 2010 <sup>40</sup>       | 1                               | 1               | -                     | -               | -               | -             |
| Trucco et al, 2011 <sup>74</sup>       | 12                              | 12              | -                     | -               | -               | -             |
| <b>Subtotal</b>                        | <b>100</b>                      | <b>44 (44%)</b> | <b>16 (16%)</b>       | <b>22 (22%)</b> | <b>13 (13%)</b> | <b>5 (5%)</b> |
| Saleeb et al, 1999 <sup>104</sup>      | 25                              | 15              | 6                     |                 | 4               | -             |
| Buyon et al, 1998 <sup>85</sup>        | 67                              | 35              | 15                    |                 | 17              |               |
| <b>TOTAL</b>                           | <b>192</b>                      | <b>94 (49%)</b> | <b>59 (31%)</b>       |                 | <b>39 (20%)</b> |               |

Supplementary online only Table 3. Outcome of babies according to the specific autoantibody maternal profile detailed in 2 prospective studies<sup>16,28</sup>

| Autoantibody maternal profile    | Tested mothers (n) | Mothers with positive antibodies n (%) | Babies with CHB from mothers with positive antibodies (%) | CHB types n (CHB type) |
|----------------------------------|--------------------|----------------------------------------|-----------------------------------------------------------|------------------------|
| Ro+                              | 141                | 140 (99.3%)                            | 4/140 (2.86)                                              | 3 (III). 1 (II)        |
| La+                              | 141                | 51 (36.17%)                            | 2/51 (3.92)                                               | 1 (III). 1 (II)        |
| Ro52+                            | 134                | 61 (45.52%)                            | 3/61 (4.92)                                               | 2 (III). 1 (II)        |
| Ro60+                            | 134                | 121 (90.3%)                            | 4/121 (3.31)                                              | 3 (III). 1 (II)        |
| <b>Combination of antibodies</b> |                    |                                        |                                                           |                        |
| Ro and La                        | 141                | 51 (36.17%)                            | 2/51 (3.92)                                               | 1 (III). 1 (II)        |
| Only Ro                          | 141                | 89 (63.12%)                            | 2/89 (2.25)                                               | 2 (III)                |
| Only La                          | 141                | 1 (0.71%)                              | 0/1 (0)                                                   | 0                      |
